# Supplementary material
Source: MDPI journal article supplement (https://www.mdpi.com/2076-3417/13/15/8679)
Supplement: s1 [file s1]

**Table S1.** Conditions of the HPLC methods used for the chromatographic analysis.

| Method | Class of interest                   | Stationary phase                             | Mobile phase                                                                                                                | Wavele<br>nght |
|--------|-------------------------------------|----------------------------------------------|-----------------------------------------------------------------------------------------------------------------------------|----------------|
| A      | Cinnamic<br>acids,<br>flavonol<br>s | KINETEX – C18 column (4.6 ×<br>150 mm, 5 µm) | A: 10 mM KH <sub>2</sub> PO <sub>4</sub> /H <sub>3</sub> PO <sub>4</sub> ,<br>pH = 2.8; B: CH <sub>3</sub> CN               | 330            |
| B      | Benzioc<br>acids,<br>catechins      | KINETEX – C18 column (4.6 ×<br>150 mm, 5 µm) | A: H <sub>2</sub> O/CH <sub>3</sub> OH/HCOOH<br>(5:95:0.1 v/v/v), pH = 2.5; B:<br>CH <sub>3</sub> OH/HCOOH (100:0.1<br>v/v) | 280            |

Elution conditions

Method A, gradient analysis: 5%B to 21%B in 17 min + 21%B in 3 min (2 min conditioning time); flow: 1.5 mL min<sup>-1</sup>

Method B, gradient analysis: 3%B to 85%B in 22 min + 85%B in 1 min (2 min conditioning time); flow: 0.6 mL min<sup>-1</sup>
