# Supplementary material
Source: MDPI journal article supplement (https://www.mdpi.com/2076-3417/13/15/8679)

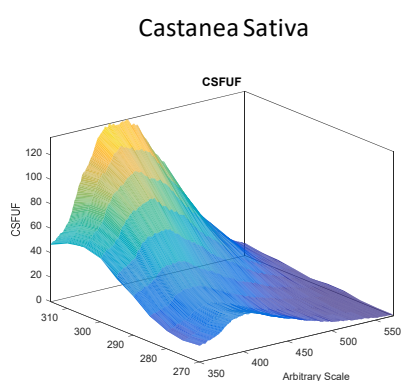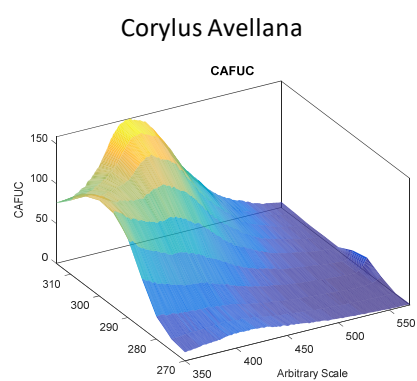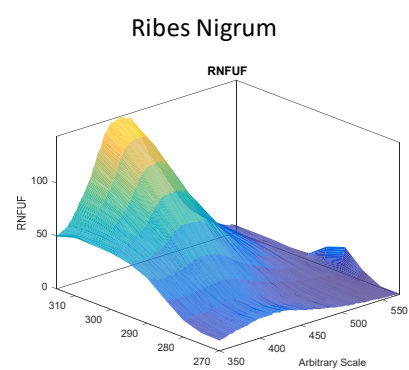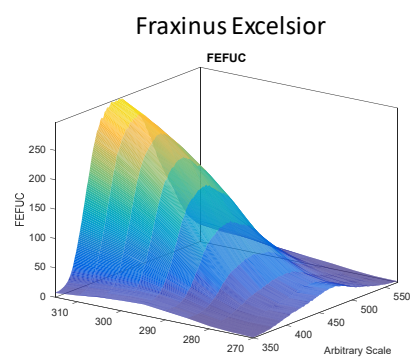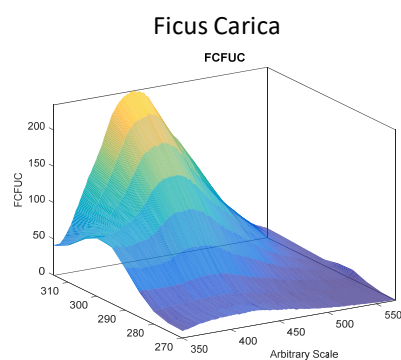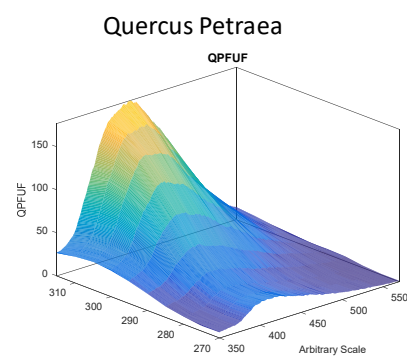

**Figure S1:** 3D EEM excitation-emission spectra.

Supplement: s1 [file s1]
